# Supplementary material for: Sintering mechanism of the Cu–Ag core–shell nanoparticle paste at low temperature in ambient air
Source: Royal Society of Chemistry journal article supplement (doi:10.1039/c6ra16474a), 2016-01-01
Supplement: c6ra16474a3.pdf [file c6ra16474a3.pdf]

## **Electronic Supporting Information**

### **Sintering mechanism of the Cu-Ag core-shell nanoparticle paste at low temperature in ambient air**

Yanhong Tian<sup>1\*</sup>, Zhi Jiang<sup>1</sup>, Chenxi Wang<sup>1</sup>, Su Ding<sup>1</sup>, Jiayue Wen<sup>1</sup>, Zhiquan Liu<sup>2</sup>,  
Chunqing Wang<sup>1</sup>

<sup>1</sup>State Key Laboratory of Advanced Welding and Joining, Harbin Institute of  
Technology, Harbin, China, 150001.

<sup>2</sup> Institute of Metal Research, Chinese Academy of Sciences, Shenyang, China,  
110016. \*E-mail address: [tianyh@hit.edu.cn](mailto:tianyh@hit.edu.cn)

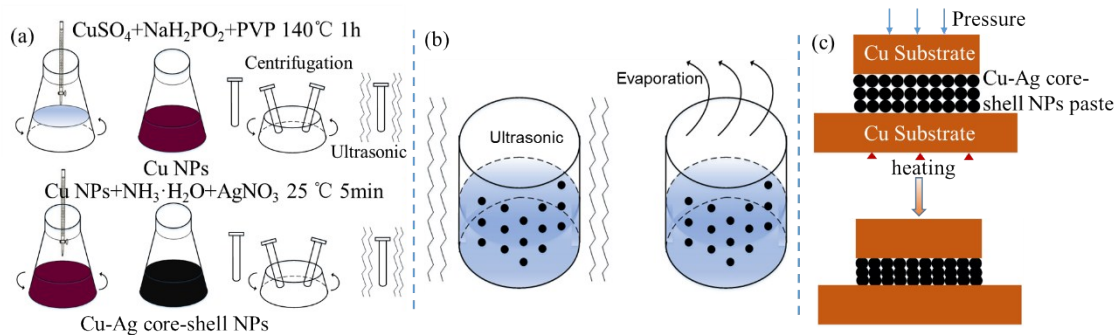

Figure S1 Schematic diagram of fabrication steps: (a) synthesis of Cu-Ag core-shell NPs using a two-step method (b) preparation of NPs paste (c) bonding Cu substrates using Cu-Ag core-shell NPs paste at low temperature.

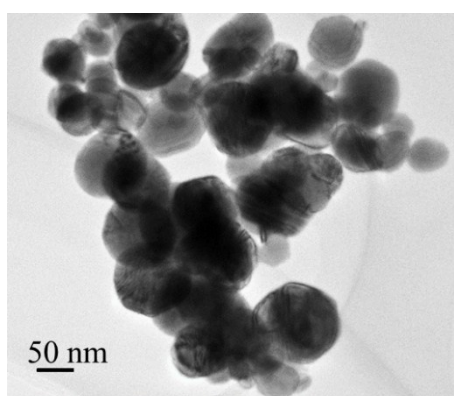

Figure S2 TEM image of initial Cu NPs

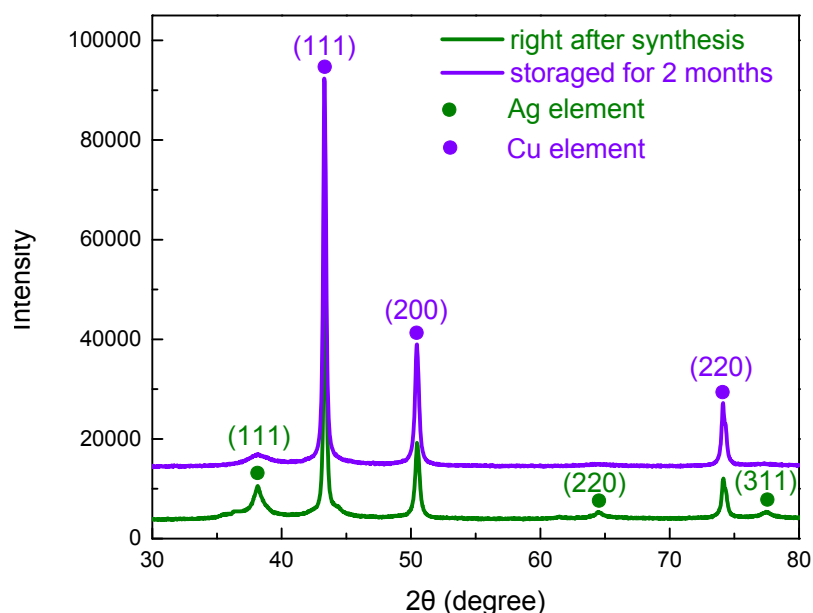

Figure S3 XRD pattern comparison of Cu-Ag core-shell NPs before and after having been stored in ethanol for 2 months.

Table 1 Quantitatively calculated composition of Cu, O, and Ag elements in bimetallic Cu-Ag NPs after having been stored for 2 months based on the Gaussian curve-fitted area.

| Cu2p [at%] |        | O1s [at%] |      | Ag3d [at%] |
|------------|--------|-----------|------|------------|
| Cu02p      | Cu2+2p | O01s      | O-2s | Ag3d       |
| 68.84      | 2.5    | 3.19      | 3.03 | 22.44      |

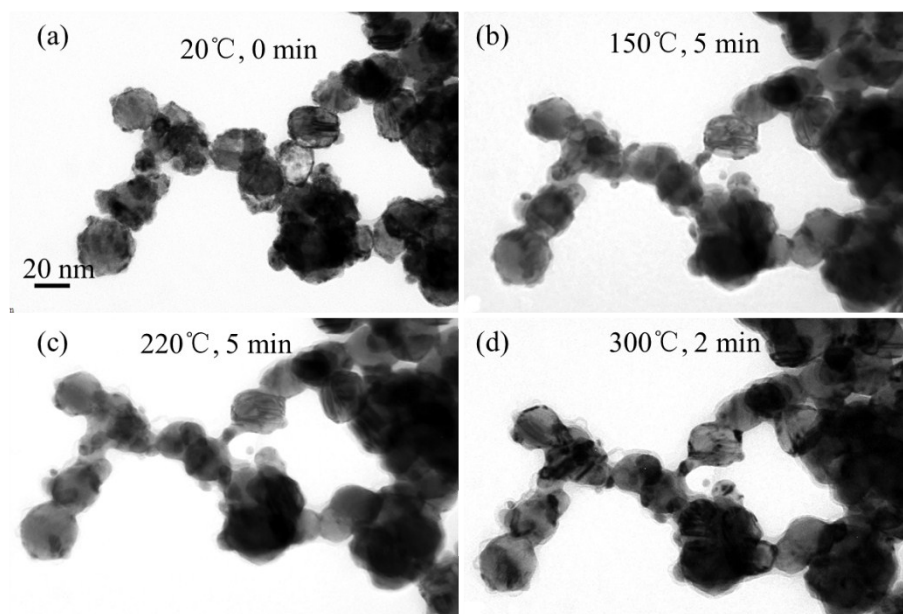

Figure S4 Joining process of Cu-Ag core-shell NPs during in situ TEM heating: (a) initial Cu-Ag core-shell NPs (b) after having been heated at 150 °C for 5 min (c) after having been heated at 220 °C for 5 min (d) after having been heated at 300 °C for 5 min.

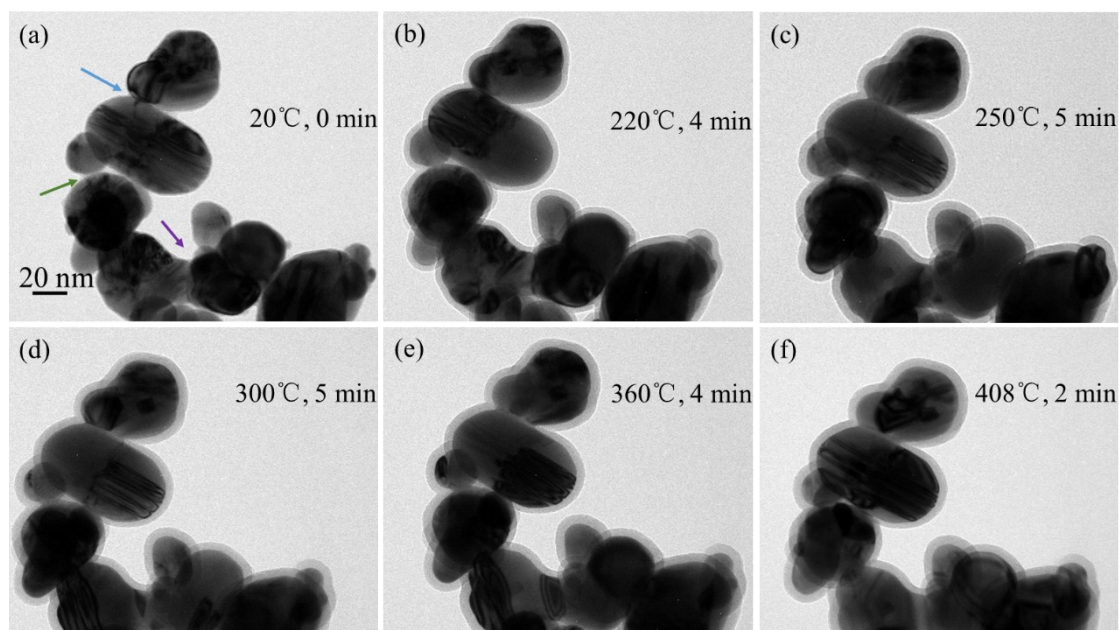

Figure S5 Joining process of Cu NPs during in situ TEM heating: (a) initial Cu NPs (b) after having been heated at 220°C for 4 min (c) after having been heated at 250°C for 5 min (d) after

having been heated at 300°C for 5 min (e) after having been heated at 360°C for 5 min (f) after having been heated at 408°C for 2 min.

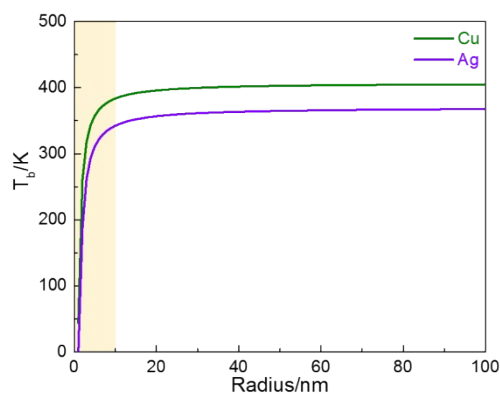

Figure S6 Numerical simulation of sintering beginning temperature of Cu and Ag NPs with different diameter.

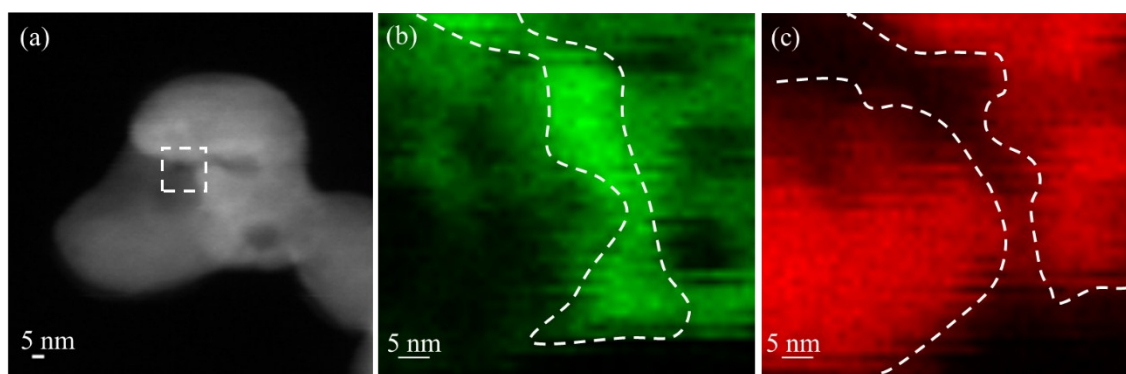

Figure S7 TEM-EDX analysis of sintered Cu-Ag core-shell NPs: (a) original TEM image (b) Ag component (c) Cu component.

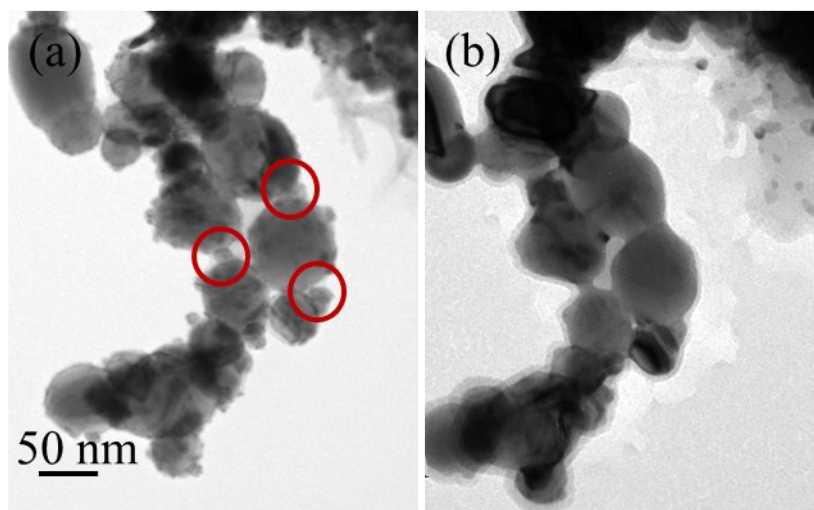

Figure S8 TEM images of (a) initial Cu-Ag core-shell NPs before heating and (b) Cu-Ag core-shell NPs after heated at 180°C for 5 min.
